# Supplementary material
Source: Elsevier journal article supplement (https://www.sciencedirect.com/science/article/pii/S0021755721000681)
Supplement: mmc1 [file S0021755721000681:mmc1.docx]

JPED-D-20-00380 – Supplementary Material

**Supplementary Material A**

**Pediatric Functional Constipation Questionnaire-Parent Form (PedFCQuest-PR): development and validation.**

**Questionário de Avaliação de Constipação em Crianças**

- Favor responder as perguntas relacionadas com o **problema do funcionamento do intestino** da criança.
- Marcar **apenas uma resposta** para cada pergunta, escolha a **melhor** resposta.

**As respostas devem considerar o que aconteceu durante as últimas 4 semanas**

**1. A cada quanto tempo a criança faz cocô no banheiro?**

1. Todos os dias
2. Três a quatro vezes por semana
3. Uma a duas vezes por semana
4. Menos de 1 vez por semana

**2. O cocô da criança é endurecido?**

1. Extremamente
2. Muito
3. Pouco
4. Nada

**3. A criança tem necessidade de ser lembrada para ir ao banheiro fazer cocô?**

1. Nunca
2. De vez em quando
3. Frequentemente
4. Sempre

**4. A criança faz esforço (força) para fazer cocô?**

1. Sempre
2. Frequentemente
3. De vez em quando
4. Nunca

**5. A criança tem dor para fazer cocô?**

1. Não sente dor
2. Pouca dor
3. Dor Moderada
4. Muita dor

**As respostas devem considerar o que aconteceu durante as últimas 4 semanas**

**6. A criança evita ir ao banheiro para fazer cocô (“segura o cocô”)?**

1. Sempre
2. Frequentemente
3. De vez em quando
4. Nunca

**7. A criança tem sensação de que não conseguiu eliminar todo o cocô?**

1. Nunca
2. De vez em quando
3. Frequentemente
4. Sempre

**8. A criança tem dor abdominal (na barriga)?**

1. Sempre
2. Frequentemente
3. De vez em quando
4. Nunca

**9. O cocô da criança entope o vaso sanitário?**

1. Nunca
2. De vez em quando
3. Frequentemente
4. Sempre

**10. A criança suja a roupa com cocô?**

1. Sempre
2. Frequentemente
3. De vez em quando
4. Nunca

**11. A criança fica incomodada quando suja a roupa com cocô?**

1. Nunca
2. De vez em quando
3. Frequentemente
4. Sempre

**As respostas devem considerar o que aconteceu durante as últimas 4 semanas**

**12. A criança esconde que sujou a roupa com cocô?**

1. Sempre
2. Frequentemente
3. De vez em quando
4. Nunca

**13. O apetite da criança está diminuído pelo problema de mau funcionamento do intestino?**

1. Nada
2. Pouco
3. Bastante
4. Extremamente

**14. A criança utiliza remédios (laxantes, supositórios) para melhorar o funcionamento do intestino?**

1. Todos os dias
2. Frequentemente
3. De vez em quando
4. Nunca

**15. A criança fica triste ou irritada por causa do problema de mau funcionamento do intestino?**

1. Nada
2. Pouco
3. Muito
4. Intensamente

**16. A criança é repreendida pelo problema de mau funcionamento do intestino?**

1. Sempre
2. Frequentemente
3. De vez em quando
4. Nunca

**As respostas devem considerar o que aconteceu durante as últimas 4 semanas**

**17. O mau funcionamento do intestino atrapalha ou interfere no relacionamento da criança com os familiares?**

1. Nada
2. Pouco
3. Muito
4. Intensamente

**18. O problema do mau funcionamento do intestino da criança causa discussões ou desacordos entre as pessoas que moram na mesma casa?**

1. Sempre
2. Frequentemente
3. De vez em quando
4. Nunca

**19. Os problemas para fazer cocô prejudicam a criança para brincar, passear ou praticar esporte?**

1. Nada
2. Pouco
3. Muito
4. Intensamente

**20. A criança recebe mais atenção por causa do problema do mau funcionamento do intestino?**

1. Concordo
2. Concordo parcialmente
3. Discordo parcialmente
4. Discordo

**21. A criança tem dificuldade em usar o banheiro fora de casa?**

1. Nunca
2. De vez em quando
3. Frequentemente
4. Sempre

**As respostas devem considerar o que aconteceu durante as últimas 4 semanas**

**22. A criança sofre provocações dos colegas da escola pelo problema de mau funcionamento do intestino?**

1. Sempre
2. Frequentemente
3. De vez em quando
4. Nunca

**23. A criança falta à escola pelos problemas de mau funcionamento do intestino?**

1. Nunca
2. De vez em quando
3. Frequentemente
4. Sempre

**24. Como é o rendimento da criança na escola?**

1. Muito ruim
2. Ruim
3. Bom
4. Muito bom

**25. Em geral, você diria que o comportamento da criança é:**

1. Muito bom
2. Bom
3. Ruim
4. Muito ruim

**26. Em geral, como classificaria a saúde da criança?**

1. Muito ruim
2. Ruim
3. Boa
4. Muito boa

**Supplementary Figure 1 - Flow diagram of participants.**
